# Supplementary material for: Health care experiences during the COVID-19 pandemic by race and social determinants of health among adults age ≥ 58 years in the REGARDS study
Source: Springer Nature journal article supplement (doi:10.1186/s12889-021-12273-8), 2021-12-01
Supplement: MOESM2 [file 19950780]

## **SUPPLEMENTAL MATERIAL**

### **Health care experiences during the COVID-19 pandemic by race and social determinants of health among adults age $\geq 58$ years in the REGARDS Study**

Emily B. Levitan,<sup>1</sup> Virginia J. Howard,<sup>1</sup> Mary Cushman,<sup>2</sup> Suzanne E. Judd,<sup>1</sup> Stephanie E. Tison,<sup>1</sup> Ya Yuan,<sup>1</sup> Debora Kamin Mukaz,<sup>2</sup> Henry E Wang,<sup>3</sup> Nathalie Pamir,<sup>4</sup> Timothy Plante,<sup>2</sup> Stephen P. Juraschek,<sup>5</sup> Monika M. Safford,<sup>6</sup> Parag Goyal<sup>6</sup>

<sup>1</sup>University of Alabama at Birmingham, Birmingham AL

<sup>2</sup>University of Vermont, Burlington, VT

<sup>3</sup>University of Texas, Houston, TX

<sup>4</sup>Oregon Health and Science University, Portland, OR

<sup>5</sup>Beth Israel Deaconess Medical Center, Boston, MA

<sup>6</sup>Weill Cornell Medicine, New York, NY

Correspondence to Emily B. Levitan, ScD, Department of Epidemiology, University of Alabama at Birmingham, Birmingham, AL 35294-0022, 205-975-7680, [elevitan@uab.edu](mailto:elevitan@uab.edu)

**Figure 1.** Logic of the REGARDS study COVID-19 survey module<sup>a</sup>

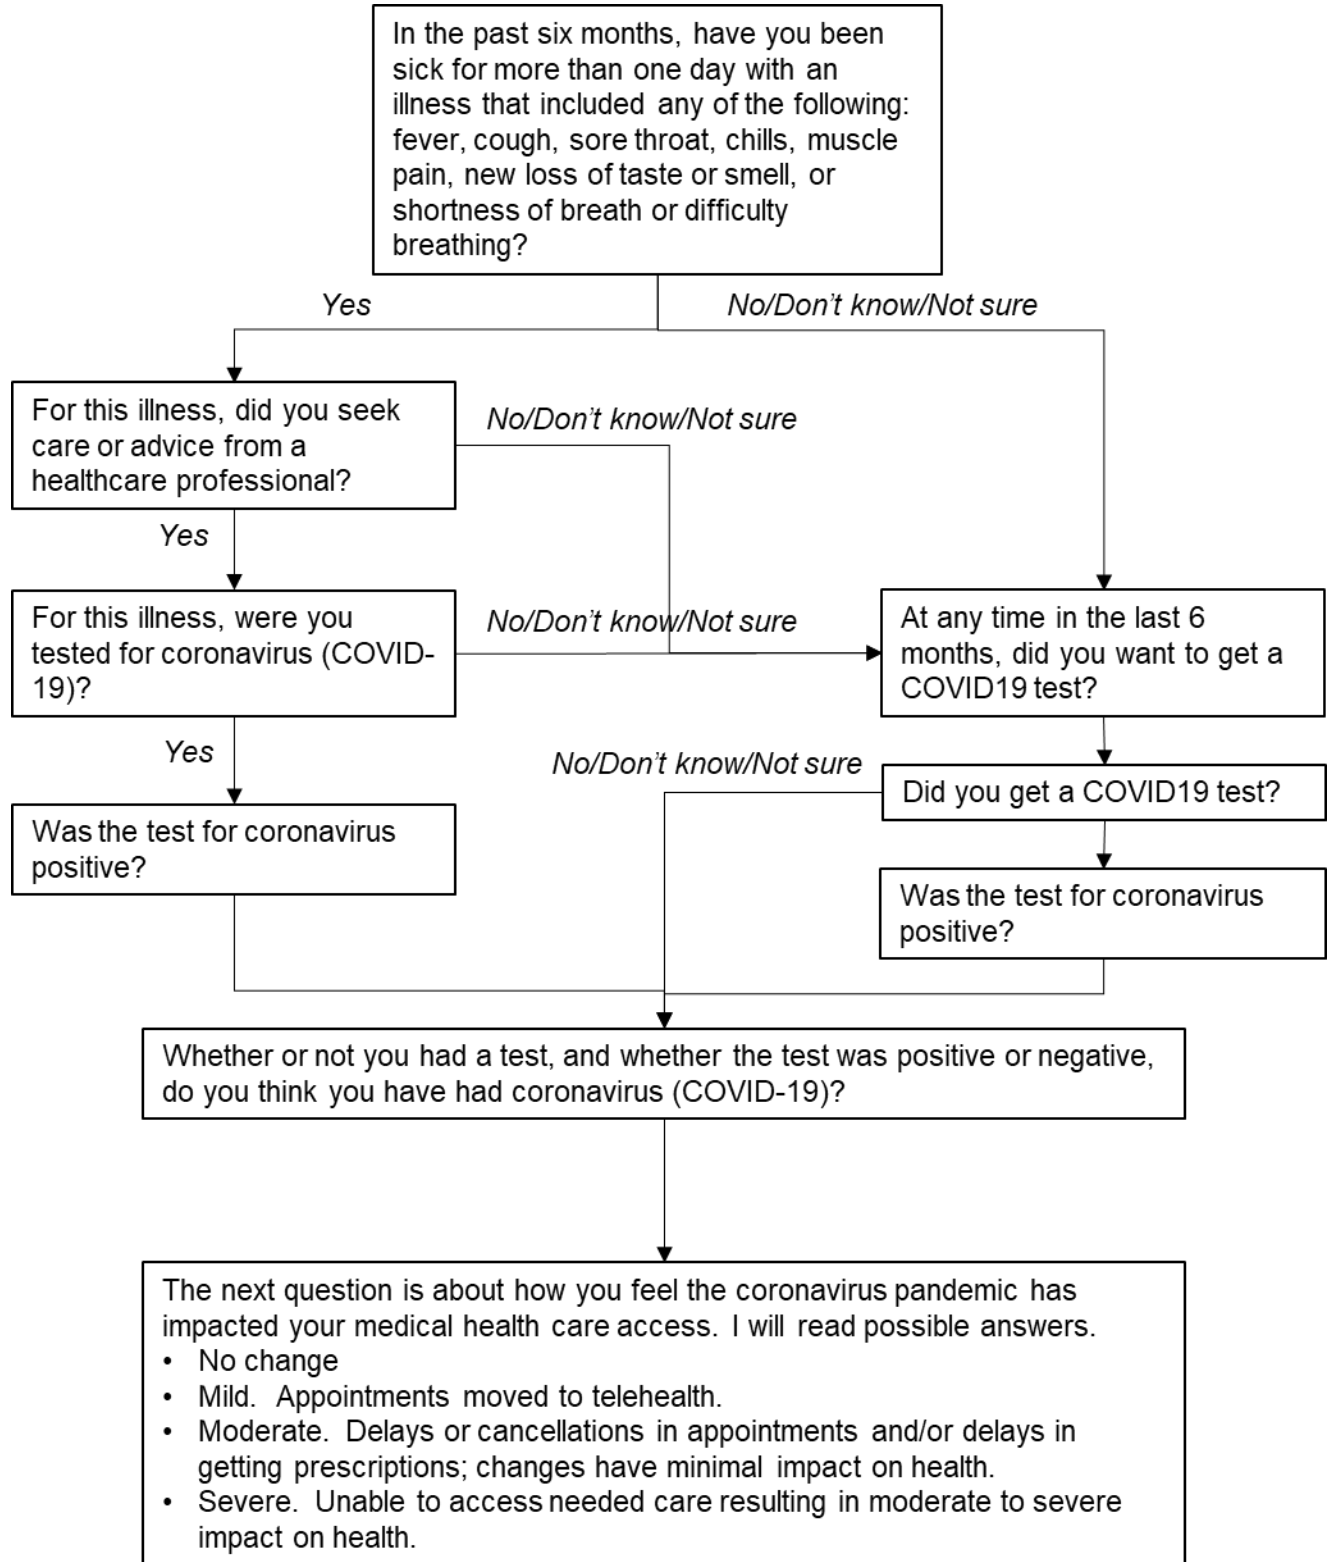

<sup>a</sup>Selected survey items

**Table 1.** Race, social determinants of health, and SARS-CoV-2 testing among participants in the REasons for Geographic And Racial Differences in Stroke (REGARDS) study who reported illness with symptoms of COVID-19<sup>a</sup>

|                                     | Sought care or advice |                     |                      | SARS-CoV-2 test     |                      | Positive SARS-CoV-2 test |                      |
|-------------------------------------|-----------------------|---------------------|----------------------|---------------------|----------------------|--------------------------|----------------------|
|                                     | N                     | N (% <sup>a</sup> ) | p-value <sup>b</sup> | N (% <sup>a</sup> ) | p-value <sup>b</sup> | N (% <sup>a</sup> )      | p-value <sup>b</sup> |
| Overall                             | 697                   | 514 (73.7%)         |                      | 349 (50.1%)         |                      | 173 (24.8%)              |                      |
| Black                               | 238                   | 177 (74.4%)         | 0.85                 | 126 (52.9%)         | 0.28                 | 66 (27.7%)               | 0.20                 |
| White                               | 459                   | 337 (73.4%)         |                      | 223 (48.6%)         |                      | 107 (23.3%)              |                      |
| Income <\$35,000                    | 216                   | 159 (73.6%)         | 0.97                 | 107 (49.5%)         | 0.97                 | 53 (24.5%)               | 0.88                 |
| Income ≥\$35,000                    | 402                   | 296 (73.6%)         |                      | 203 (50.5%)         |                      | 102 (25.4%)              |                      |
| Income not reported                 | 79                    | 59 (74.7%)          |                      | 39 (49.4%)          |                      | 18 (22.8%)               |                      |
| Unmarried                           | 257                   | 184 (71.6%)         | 0.31                 | 126 (49.0%)         | 0.67                 | 54 (21.0%)               | 0.08                 |
| Married                             | 440                   | 330 (75.0%)         |                      | 223 (50.7%)         |                      | 119 (27.1%)              |                      |
| Less than high school               | 39                    | 25 (64.1%)          | 0.33                 | 14 (35.9%)          | 0.07                 | 9 (23.1%)                | 0.80                 |
| High school and greater             | 658                   | 489 (74.3%)         |                      | 335 (50.9%)         |                      | 164 (24.9%)              |                      |
| Area-level poverty >25%             | 116                   | 87 (75.0%)          | 0.77                 | 61 (52.6%)          | 0.46                 | 37 (31.9%)               | 0.047                |
| Area-level poverty ≤25%             | 565                   | 414 (73.3%)         |                      | 276 (48.9%)         |                      | 131 (23.2%)              |                      |
| Rural                               | 133                   | 110 (82.7%)         | 0.02                 | 83 (62.4%)          | 0.002                | 46 (34.6%)               | 0.004                |
| Urban                               | 551                   | 398 (72.2%)         |                      | 262 (47.6%)         |                      | 124 (22.5%)              |                      |
| Poor public health infrastructure   | 246                   | 189 (76.8%)         | 0.26                 | 145 (58.9%)         | <0.001               | 75 (30.5%)               | 0.01                 |
| Better public health infrastructure | 451                   | 325 (72.1%)         |                      | 204 (45.2%)         |                      | 98 (21.7%)               |                      |
| Medicaid non-expansion              | 372                   | 276 (74.2%)         | 0.96                 | 192 (51.6%)         | 0.38                 | 102 (27.4%)              | 0.09                 |
| Medicaid expansion                  | 325                   | 238 (73.2%)         |                      | 157 (48.3%)         |                      | 71 (21.9%)               |                      |
| More segregated neighborhood        | 323                   | 242 (74.9%)         | 0.37                 | 161 (49.9%)         | 0.88                 | 72 (22.3%)               | 0.15                 |
| Less segregated neighborhood        | 373                   | 272 (72.9%)         |                      | 188 (50.4%)         |                      | 101 (27.1%)              |                      |

<sup>a</sup>Row percentage. Denominator is number of individuals with that characteristic.

<sup>b</sup>Chi-square test comparing percentage with versus without the characteristic

**Table 1a.** Race, social determinants of health, and SARS-CoV-2 testing among participants in the REasons for Geographic And Racial Differences in Stroke (REGARDS) study who reported illness with symptoms of COVID-19, standardized to the age, race, sex, and geographic distribution of estimated US 2020 population

|                                     | Sought care or advice |                      | SARS-CoV-2 test |                      | Positive SARS-CoV-2 test |                      |
|-------------------------------------|-----------------------|----------------------|-----------------|----------------------|--------------------------|----------------------|
|                                     | % <sup>a</sup>        | p-value <sup>b</sup> | % <sup>a</sup>  | p-value <sup>b</sup> | % <sup>a</sup>           | p-value <sup>b</sup> |
| Overall                             | 71.1%                 |                      | 45.3%           |                      | 21.3%                    |                      |
| Black                               | 76.3%                 | 0.31                 | 58.1%           | 0.02                 | 34.2%                    | 0.007                |
| White                               | 70.5%                 |                      | 43.9%           |                      | 19.9%                    |                      |
| Income <\$35,000                    | 71.9%                 | 0.87                 | 41.6%           | 0.33                 | 22.6%                    | 0.89                 |
| Income ≥\$35,000                    | 71.9%                 |                      | 47.7%           |                      | 21.3%                    |                      |
| Income not reported                 | 63.3%                 |                      | 35.9%           |                      | 18.0%                    |                      |
| Unmarried                           | 64.6%                 | 0.15                 | 37.8%           | 0.11                 | 14.7%                    | 0.07                 |
| Married                             | 74.0%                 |                      | 48.6%           |                      | 24.2%                    |                      |
| Less than high school               | 59.6%                 | 0.45                 | 43.0%           | 0.88                 | 34.8%                    | 0.33                 |
| High school and greater             | 71.5%                 |                      | 45.4%           |                      | 20.8%                    |                      |
| Area-level poverty >25%             | 56.2%                 | 0.11                 | 45.0%           | 0.96                 | 36.3%                    | 0.06                 |
| Area-level poverty ≤25%             | 72.4%                 |                      | 44.5%           |                      | 19.5%                    |                      |
| Rural                               | 77.5%                 | 0.46                 | 54.1%           | 0.27                 | 33.1%                    | 0.046                |
| Urban                               | 71.3%                 |                      | 44.3%           |                      | 18.8%                    |                      |
| Poor public health infrastructure   | 75.5%                 | 0.42                 | 57.0%           | 0.051                | 23.0%                    | 0.68                 |
| Better public health infrastructure | 70.0%                 |                      | 42.5%           |                      | 20.9%                    |                      |
| Medicaid non-expansion              | 70.8%                 | 0.94                 | 52.2%           | 0.15                 | 25.3%                    | 0.29                 |
| Medicaid expansion                  | 71.2%                 |                      | 42.9%           |                      | 19.9%                    |                      |
| More segregated neighborhood        | 71.2%                 | 0.98                 | 42.6%           | 0.45                 | 19.8%                    | 0.61                 |
| Less segregated neighborhood        | 71.0%                 |                      | 47.6%           |                      | 22.5%                    |                      |

<sup>a</sup>Row percentage standardized to the age, race, sex, and geographic distribution of estimated US 2020 population

<sup>b</sup>P-value from bivariate logistic regression with inverse probability of sampling weights and robust standard errors

**Table 1b.** Race, social determinants of health, and SARS-CoV-2 testing among participants in the REasons for Geographic And Racial Differences in Stroke (REGARDS) study who reported illness with symptoms of COVID-19, July 6, 2020-December 31, 2020

|                                     | N   | Sought care or advice |                      | SARS-CoV-2 test     |                      | Positive SARS-CoV-2 test |                      |
|-------------------------------------|-----|-----------------------|----------------------|---------------------|----------------------|--------------------------|----------------------|
|                                     |     | N (% <sup>a</sup> )   | p-value <sup>b</sup> | N (% <sup>a</sup> ) | p-value <sup>b</sup> | N (% <sup>a</sup> )      | p-value <sup>b</sup> |
| Overall                             | 506 | 367 (72.5%)           |                      | 221 (43.7%)         |                      | 83 (16.4%)               |                      |
| Black                               | 166 | 199 (71.7%)           | 0.77                 | 81 (48.8%)          | 0.10                 | 37 (22.3%)               | 0.01                 |
| White                               | 340 | 248 (72.9%)           |                      | 140 (41.2%)         |                      | 46 (13.5%)               |                      |
| Income <\$35,000                    | 152 | 113 (74.3%)           | 0.83                 | 66 (43.4%)          | 0.87                 | 24 (15.8%)               | 0.53                 |
| Income ≥\$35,000                    | 295 | 212 (71.9%)           |                      | 131 (44.4%)         |                      | 52 (17.6%)               |                      |
| Income not reported                 | 59  | 42 (71.2%)            |                      | 24 (40.7%)          |                      | 7 (11.9%)                |                      |
| Unmarried                           | 187 | 137 (73.3%)           | 0.78                 | 84 (44.9%)          | 0.67                 | 30 (16.0%)               | 0.87                 |
| Married                             | 319 | 230 (72.1%)           |                      | 137 (42.9%)         |                      | 53 (16.6%)               |                      |
| Less than high school               | 26  | 16 (61.5%)            | 0.20                 | 6 (23.1%)           | 0.03                 | 2 (7.7%)                 | 0.22                 |
| High school and greater             | 480 | 351 (73.1%)           |                      | 215 (44.8%)         |                      | 81 (16.9%)               |                      |
| Area-level poverty >25%             | 79  | 56 (70.9%)            | 0.75                 | 34 (43.0%)          | 0.94                 | 21 (26.6%)               | 0.005                |
| Area-level poverty ≤25%             | 413 | 300 (72.6%)           |                      | 176 (42.6%)         |                      | 58 (14.0%)               |                      |
| Rural                               | 90  | 75 (83.3%)            | 0.02                 | 52 (57.8%)          | 0.004                | 22 (24.4%)               | 0.02                 |
| Urban                               | 407 | 288 (70.8%)           |                      | 167 (41.0%)         |                      | 59 (14.5%)               |                      |
| Poor public health infrastructure   | 181 | 134 (74.0%)           | 0.57                 | 94 (51.9%)          | 0.005                | 39 (21.5%)               | 0.02                 |
| Better public health infrastructure | 325 | 233 (71.7%)           |                      | 127 (39.1%)         |                      | 44 (13.5%)               |                      |
| Medicaid non-expansion              | 266 | 192 (72.2%)           | 0.85                 | 121 (45.5%)         | 0.39                 | 49 (18.4%)               | 0.20                 |
| Medicaid expansion                  | 240 | 175 (72.9%)           |                      | 100 (41.7%)         |                      | 34 (14.2%)               |                      |
| More segregated neighborhood        | 244 | 179 (73.4%)           | 0.74                 | 107 (43.9%)         | 0.97                 | 37 (15.2%)               | 0.46                 |
| Less segregated neighborhood        | 261 | 188 (72.0%)           |                      | 114 (43.7%)         |                      | 46 (17.6%)               |                      |

<sup>a</sup>Row percentage. Denominator is number of individuals with that characteristic.

<sup>b</sup>Chi-square test comparing percentage with versus without the characteristic

**Table 1c.** Race, social determinants of health, and SARS-CoV-2 testing among participants in the REasons for Geographic And Racial Differences in Stroke (REGARDS) study who reported illness with symptoms of COVID-19, January 1, 2021-September 4, 2021

|                                     | Sought care or advice |                     |                      | SARS-CoV-2 test     |                      | Positive SARS-CoV-2 test |                      |
|-------------------------------------|-----------------------|---------------------|----------------------|---------------------|----------------------|--------------------------|----------------------|
|                                     | N                     | N (% <sup>a</sup> ) | p-value <sup>b</sup> | N (% <sup>a</sup> ) | p-value <sup>b</sup> | N (% <sup>a</sup> )      | p-value <sup>b</sup> |
| Overall                             | 191                   | 147 (77.0%)         |                      | 128 (67.0%)         |                      | 90 (47.1%)               |                      |
| Black                               | 72                    | 58 (80.6%)          | 0.57                 | 45 (62.5%)          | 0.30                 | 29 (40.3%)               | 0.14                 |
| White                               | 119                   | 89 (74.8%)          |                      | 83 (69.7%)          |                      | 61 (51.3%)               |                      |
| Income <\$35,000                    | 64                    | 46 (71.9%)          | 0.74                 | 41 (64.1%)          | 0.66                 | 29 (45.3%)               | 0.74                 |
| Income ≥\$35,000                    | 107                   | 84 (78.5%)          |                      | 72 (67.3%)          |                      | 50 (46.7%)               |                      |
| Income not reported                 | 20                    | 17 (85.0%)          |                      | 15 (75.0%)          |                      | 11 (55.0%)               |                      |
| Unmarried                           | 70                    | 47 (67.1%)          | 0.01                 | 42 (60.0%)          | 0.12                 | 24 (34.3%)               | 0.007                |
| Married                             | 121                   | 100 (82.6%)         |                      | 86 (71.1%)          |                      | 66 (54.5%)               |                      |
| Less than high school               | 13                    | 9 (69.2%)           | 0.69                 | 8 (61.5%)           | 0.66                 | 7 (53.8%)                | 0.61                 |
| High school and greater             | 178                   | 138 (77.5%)         |                      | 120 (67.4%)         |                      | 83 (46.6%)               |                      |
| Area-level poverty >25%             | 37                    | 31 (83.8%)          | 0.46                 | 27 (73.0%)          | 0.40                 | 16 (43.2%)               | 0.60                 |
| Area-level poverty ≤25%             | 152                   | 114 (75.0%)         |                      | 100 (65.8%)         |                      | 73 (48.0%)               |                      |
| Rural                               | 43                    | 35 (81.4%)          | 0.45                 | 31 (72.1%)          | 0.45                 | 24 (55.8%)               | 0.22                 |
| Urban                               | 144                   | 110 (76.4%)         |                      | 95 (66.0%)          |                      | 65 (45.1%)               |                      |
| Poor public health infrastructure   | 65                    | 55 (84.6%)          | 0.15                 | 51 (78.5%)          | 0.02                 | 36 (55.4%)               | 0.10                 |
| Better public health infrastructure | 126                   | 92 (73.0%)          |                      | 77 (61.1%)          |                      | 54 (42.9%)               |                      |
| Medicaid non-expansion              | 106                   | 84 (79.2%)          | 0.70                 | 71 (67.0%)          | 0.99                 | 53 (50.0%)               | 0.37                 |
| Medicaid expansion                  | 85                    | 63 (74.1%)          |                      | 57 (67.1%)          |                      | 37 (43.5%)               |                      |
| More segregated neighborhood        | 79                    | 63 (79.7%)          | 0.42                 | 54 (68.4%)          | 0.74                 | 35 (44.3%)               | 0.51                 |
| Less segregated neighborhood        | 112                   | 84 (75.0%)          |                      | 74 (66.1%)          |                      | 55 (49.1%)               |                      |

<sup>a</sup>Row percentage. Denominator is number of individuals with that characteristic.

<sup>b</sup>Chi-square test comparing percentage with versus without the characteristic

**Table 2.** Race, social determinants of health, and SARS-CoV-2 testing among participants in the REasons for Geographic And Racial Differences in Stroke (REGARDS) study who did not report illness with symptoms of COVID-19

|                                     | N     | Wanted a SARS-CoV-2 test |                      | Wanted and received a SARS-CoV-2 test |                      | Did not want but received a SARS-CoV-2 test |                      | Positive SARS-CoV-2 test |                      |
|-------------------------------------|-------|--------------------------|----------------------|---------------------------------------|----------------------|---------------------------------------------|----------------------|--------------------------|----------------------|
|                                     |       | N (% <sup>a</sup> )      | P-value <sup>b</sup> | N (% <sup>a</sup> )                   | P-value <sup>b</sup> | N (% <sup>a</sup> )                         | P-value <sup>b</sup> | N (% <sup>a</sup> )      | P-value <sup>b</sup> |
| Overall                             | 8,795 | 2,525 (28.7%)            |                      | 1,972 (22.4%)                         |                      | 744 (8.5%)                                  |                      | 85 (1.0%)                |                      |
| Black                               | 3,178 | 1,222 (38.5%)            | <0.001               | 948 (29.8%)                           | <0.001               | 280 (8.8%)                                  | 0.37                 | 43 (1.4%)                | 0.005                |
| White                               | 5,617 | 1,303 (23.2%)            |                      | 1,024 (18.2%)                         |                      | 464 (8.3%)                                  |                      | 42 (0.8%)                |                      |
| Income <\$35,000                    | 2,660 | 777 (29.2%)              | 0.01                 | 580 (21.8%)                           | 0.009                | 222 (8.4%)                                  | 0.46                 | 37 (1.4%)                | 0.03                 |
| Income ≥\$35,000                    | 4,954 | 1,451 (29.3%)            |                      | 1,162 (23.5%)                         |                      | 432 (8.7%)                                  |                      | 40 (0.8%)                |                      |
| Income not reported                 | 1,181 | 297 (25.2%)              |                      | 230 (19.5%)                           |                      | 90 (7.6%)                                   |                      | 8 (0.7%)                 |                      |
| Unmarried                           | 3,468 | 1,057 (30.5%)            | 0.003                | 818 (23.6%)                           | 0.03                 | 295 (8.5%)                                  | 0.90                 | 38 (1.1%)                | 0.32                 |
| Married                             | 5,327 | 1,468 (27.6%)            |                      | 1,154 (21.7%)                         |                      | 449 (8.4%)                                  |                      | 47 (0.9%)                |                      |
| Less than high school               | 519   | 145 (27.9%)              | 0.69                 | 112 (21.6%)                           | 0.63                 | 48 (9.3%)                                   | 0.51                 | 12 (2.3%)                | 0.001                |
| High school and greater             | 8,275 | 2,380 (28.8%)            |                      | 1,860 (22.5%)                         |                      | 696 (8.4%)                                  |                      | 73 (0.9%)                |                      |
| Area-level poverty >25%             | 1,372 | 470 (34.3%)              | <0.001               | 365 (26.6%)                           | <0.001               | 118 (8.6%)                                  | 0.77                 | 18 (1.3%)                | 0.16                 |
| Area-level poverty ≤25%             | 7,273 | 2,018 (27.8%)            |                      | 1,576 (21.7%)                         |                      | 608 (8.4%)                                  |                      | 66 (0.9%)                |                      |
| Rural                               | 1,451 | 375 (25.8%)              | 0.008                | 319 (22.0%)                           | 0.66                 | 122 (8.4%)                                  | 0.96                 | 14 (1.0%)                | 0.96                 |
| Urban                               | 7,256 | 2,126 (29.3%)            |                      | 1,633 (22.5%)                         |                      | 613 (8.5%)                                  |                      | 71 (1.0%)                |                      |
| Poor public health infrastructure   | 2,890 | 834 (28.9%)              | 0.83                 | 660 (22.8%)                           | 0.51                 | 229 (7.9%)                                  | 0.21                 | 31 (1.1%)                | 0.48                 |
| Better public health infrastructure | 5,905 | 1,691 (28.6%)            |                      | 1,312 (22.2%)                         |                      | 515 (8.7%)                                  |                      | 54 (0.9%)                |                      |
| Medicaid non-expansion              | 4,759 | 1,339 (28.1%)            | 0.20                 | 1,060 (22.3%)                         | 0.72                 | 385 (8.1%)                                  | 0.18                 | 51 (1.1%)                | 0.27                 |
| Medicaid expansion                  | 4,036 | 1,186 (29.4%)            |                      | 912 (22.6%)                           |                      | 359 (8.9%)                                  |                      | 34 (0.8%)                |                      |
| More segregated neighborhood        | 4,421 | 1,402 (31.7%)            | <0.001               | 1,084 (24.5%)                         | <0.001               | 383 (8.7%)                                  | 0.48                 | 49 (1.1%)                | 0.17                 |
| Less segregated neighborhood        | 4,368 | 1,123 (25.7%)            |                      | 888 (20.3%)                           |                      | 360 (8.2%)                                  |                      | 36 (0.8%)                |                      |

<sup>a</sup>Row percentage. Denominator is number of individuals with that characteristic.

<sup>b</sup>Chi-square test comparing percentage with versus without the characteristic

**Table 2a.** Race, social determinants of health, and SARS-CoV-2 testing among participants in the REasons for Geographic And Racial Differences in Stroke (REGARDS) study who did not report illness with symptoms of COVID-19, standardized to the age, race, sex, and geographic distribution of the 2020 US Census

|                                     | Wanted a SARS-CoV-2 test |                      | Wanted and received a SARS-CoV-2 test |                      | Did not want but received a SARS-CoV-2 test |                      | Positive SARS-CoV-2 test |                      |
|-------------------------------------|--------------------------|----------------------|---------------------------------------|----------------------|---------------------------------------------|----------------------|--------------------------|----------------------|
|                                     | % <sup>a</sup>           | p-value <sup>b</sup> | % <sup>a</sup>                        | p-value <sup>b</sup> | % <sup>a</sup>                              | p-value <sup>b</sup> | % <sup>a</sup>           | p-value <sup>b</sup> |
| Overall                             | 27.4%                    |                      | 21.3%                                 |                      | 9.0%                                        |                      | 0.6%                     |                      |
| Black                               | 41.8%                    | <0.001               | 33.3%                                 | <0.001               | 9.8%                                        | 0.44                 | 1.2%                     | 0.054                |
| White                               | 25.3%                    |                      | 19.6%                                 |                      | 8.9%                                        |                      | 0.6%                     |                      |
| Income <\$35,000                    | 28.0%                    | 0.68                 | 21.0%                                 | 0.40                 | 8.4%                                        | 0.23                 | 0.7%                     | 0.94                 |
| Income ≥\$35,000                    | 28.0%                    |                      | 21.9%                                 |                      | 9.6%                                        |                      | 0.7%                     |                      |
| Income not reported                 | 22.4%                    |                      | 17.8%                                 |                      | 6.7%                                        |                      | 0.3%                     |                      |
| Unmarried                           | 30.1%                    | 0.03                 | 23.2%                                 | 0.09                 | 9.0%                                        | 0.94                 | 0.5%                     | 0.58                 |
| Married                             | 26.2%                    |                      | 20.4%                                 |                      | 9.1%                                        |                      | 0.7%                     |                      |
| Less than high school               | 17.9%                    | 0.002                | 14.5%                                 | 0.01                 | 10.3%                                       | 0.65                 | 1.3%                     | 0.12                 |
| High school and greater             | 27.6%                    |                      | 21.5%                                 |                      | 9.0%                                        |                      | 0.6%                     |                      |
| Area-level poverty >25%             | 34.4%                    | 0.004                | 26.4%                                 | 0.02                 | 9.6%                                        | 0.67                 | 0.7%                     | 0.71                 |
| Area-level poverty ≤25%             | 27.0%                    |                      | 21.0%                                 |                      | 8.9%                                        |                      | 0.6%                     |                      |
| Rural                               | 20.0%                    | <0.001               | 16.9%                                 | 0.02                 | 8.5%                                        | 0.66                 | 0.4%                     | 0.39                 |
| Urban                               | 28.6%                    |                      | 21.9%                                 |                      | 9.1%                                        |                      | 0.7%                     |                      |
| Poor public health infrastructure   | 28.5%                    | 0.46                 | 22.8%                                 | 0.30                 | 7.3%                                        | 0.06                 | 0.8%                     | 0.56                 |
| Better public health infrastructure | 27.1%                    |                      | 20.9%                                 |                      | 9.4%                                        |                      | 0.6%                     |                      |
| Medicaid non-expansion              | 27.9%                    | 0.67                 | 22.4%                                 | 0.31                 | 7.5%                                        | 0.03                 | 0.6%                     | 0.85                 |
| Medicaid expansion                  | 27.2%                    |                      | 20.8%                                 |                      | 9.7%                                        |                      | 0.6%                     |                      |
| More segregated neighborhood        | 30.0%                    | 0.002                | 23.2%                                 | 0.01                 | 9.3%                                        | 0.59                 | 0.6%                     | 0.97                 |
| Less segregated neighborhood        | 24.7%                    |                      | 19.3%                                 |                      | 8.7%                                        |                      | 0.6%                     |                      |

<sup>a</sup>Row percentage standardized to the age, race, sex, and geographic distribution of estimated US 2020 population

<sup>b</sup>P-value from bivariate logistic regression with inverse probability of sampling weights and robust standard errors



**Table 2b.** Race, social determinants of health, and SARS-CoV-2 testing among participants in the REasons for Geographic And Racial Differences in Stroke (REGARDS) study who did not report illness with symptoms of COVID-19, July 6, 2020-December 31, 2020

|                                     | N     | Wanted a SARS-CoV-2 test |                      | Wanted and received a SARS-CoV-2 test |                      | Did not want but received a SARS-CoV-2 test |                      | Positive SARS-CoV-2 test |                      |
|-------------------------------------|-------|--------------------------|----------------------|---------------------------------------|----------------------|---------------------------------------------|----------------------|--------------------------|----------------------|
|                                     |       | N (% <sup>a</sup> )      | P-value <sup>b</sup> | N (% <sup>a</sup> )                   | P-value <sup>b</sup> | N (% <sup>a</sup> )                         | P-value <sup>b</sup> | N (% <sup>a</sup> )      | P-value <sup>b</sup> |
| Overall                             | 6,561 | 1,709 (26.0%)            |                      | 1,309 (20.0%)                         |                      | 515 (7.9%)                                  |                      | 51 (0.8%)                |                      |
| Black                               | 2,304 | 827 (35.9%)              | <0.001               | 635 (27.6%)                           | <0.001               | 185 (8.0%)                                  | 0.69                 | 22 (1.0%)                | 0.23                 |
| White                               | 4,257 | 882 (20.7%)              |                      | 674 (15.8%)                           |                      | 330 (7.8%)                                  |                      | 29 (0.7%)                |                      |
| Income <\$35,000                    | 1,963 | 514 (26.2%)              | 0.04                 | 376 (19.2%)                           | 0.02                 | 142 (7.2%)                                  | 0.36                 | 24 (1.2%)                | 0.02                 |
| Income ≥\$35,000                    | 3,718 | 996 (26.8%)              |                      | 783 (21.1%)                           |                      | 307 (8.3%)                                  |                      | 23 (0.6%)                |                      |
| Income not reported                 | 880   | 199 (22.6%)              |                      | 150 (17.0%)                           |                      | 66 (7.5%)                                   |                      | 4 (0.5%)                 |                      |
| Unmarried                           | 2,573 | 711 (27.6%)              | 0.02                 | 542 (21.1%)                           | 0.07                 | 206 (8.0%)                                  | 0.70                 | 24 (0.9%)                | 0.25                 |
| Married                             | 3,988 | 998 (25.0%)              |                      | 767 (19.2%)                           |                      | 309 (7.7%)                                  |                      | 27 (0.7%)                |                      |
| Less than high school               | 377   | 92 (24.4%)               | 0.45                 | 69 (18.3%)                            | 0.41                 | 32 (8.5%)                                   | 0.64                 | 9 (2.4%)                 | <0.001               |
| High school and greater             | 6,183 | 1,617 (26.2%)            |                      | 1,240 (20.1%)                         |                      | 483 (7.8%)                                  |                      | 42 (0.7%)                |                      |
| Area-level poverty >25%             | 1,001 | 318 (31.8%)              | <0.001               | 245 (24.5%)                           | <0.001               | 81 (8.1%)                                   | 0.74                 | 10 (1.0%)                | 0.42                 |
| Area-level poverty ≤25%             | 5,446 | 1,366 (25.1%)            |                      | 1,044 (19.2%)                         |                      | 424 (7.8%)                                  |                      | 41 (0.8%)                |                      |
| Rural                               | 1,086 | 251 (23.1%)              | 0.02                 | 213 (19.6%)                           | 0.77                 | 87 (8.0%)                                   | 0.84                 | 6 (0.6%)                 | 0.34                 |
| Urban                               | 5,415 | 1,442 (26.6%)            |                      | 1,083 (20.0%)                         |                      | 424 (7.8%)                                  |                      | 45 (0.8%)                |                      |
| Poor public health infrastructure   | 2,181 | 571 (26.2%)              | 0.86                 | 443 (20.3%)                           | 0.61                 | 164 (7.5%)                                  | 0.48                 | 17 (0.8%)                | 0.99                 |
| Better public health infrastructure | 4,380 | 1,138 (26.0%)            |                      | 866 (19.8%)                           |                      | 351 (8.0%)                                  |                      | 34 (0.8%)                |                      |
| Medicaid non-expansion              | 3,519 | 898 (25.5%)              | 0.29                 | 696 (19.8%)                           | 0.71                 | 263 (7.5%)                                  | 0.22                 | 26 (0.7%)                | 0.70                 |
| Medicaid expansion                  | 3,042 | 811 (26.7%)              |                      | 613 (20.2%)                           |                      | 252 (8.3%)                                  |                      | 25 (0.8%)                |                      |
| More segregated neighborhood        | 3,299 | 948 (28.7%)              | <0.001               | 716 (21.7%)                           | <0.001               | 265 (8.0%)                                  | 0.56                 | 30 (0.9%)                | 0.22                 |
| Less segregated neighborhood        | 3,256 | 761 (23.4%)              |                      | 593 (18.2%)                           |                      | 249 (7.6%)                                  |                      | 21 (0.6%)                |                      |

<sup>a</sup>Row percentage. Denominator is number of individuals with that characteristic.

<sup>b</sup>Chi-square test comparing percentage with versus without the characteristic

**Table 2c.** Race, social determinants of health, and SARS-CoV-2 testing among participants in the REasons for Geographic And Racial Differences in Stroke (REGARDS) study who did not report illness with symptoms of COVID-19, January 1, 2021-September 6, 2021

|                                     | N     | Wanted a SARS-CoV-2 test |                      | Wanted and received a SARS-CoV-2 test |                      | Did not want but received a SARS-CoV-2 test |                      | Positive SARS-CoV-2 test |                      |
|-------------------------------------|-------|--------------------------|----------------------|---------------------------------------|----------------------|---------------------------------------------|----------------------|--------------------------|----------------------|
|                                     |       | N (% <sup>a</sup> )      | P-value <sup>b</sup> | N (% <sup>a</sup> )                   | P-value <sup>b</sup> | N (% <sup>a</sup> )                         | P-value <sup>b</sup> | N (% <sup>a</sup> )      | P-value <sup>b</sup> |
| Overall                             | 2,234 | 816 (36.5%)              |                      | 663 (29.7%)                           |                      | 229 (10.3%)                                 |                      | 34 (1.5%)                |                      |
| Black                               | 874   | 395 (45.2%)              | <0.001               | 313 (35.8%)                           | <0.001               | 95 (10.9%)                                  | 0.44                 | 21 (2.4%)                | 0.006                |
| White                               | 1,360 | 421 (31.0%)              |                      | 350 (25.7%)                           |                      | 134 (9.9%)                                  |                      | 13 (1.0%)                |                      |
| Income <\$35,000                    | 697   | 263 (37.7%)              | 0.28                 | 204 (29.3%)                           | 0.36                 | 80 (11.5%)                                  | 0.24                 | 13 (1.9%)                | 0.67                 |
| Income ≥\$35,000                    | 1,236 | 455 (36.8%)              |                      | 379 (30.7%)                           |                      | 125 (10.1%)                                 |                      | 17 (1.4%)                |                      |
| Income not reported                 | 301   | 98 (32.6%)               |                      | 80 (26.6%)                            |                      | 24 (8.0%)                                   |                      | 4 (1.3%)                 |                      |
| Unmarried                           | 895   | 346 (38.7%)              | 0.09                 | 276 (30.8%)                           | 0.33                 | 89 (9.9%)                                   | 0.70                 | 14 (1.6%)                | 0.89                 |
| Married                             | 1,339 | 470 (35.1%)              |                      | 387 (28.9%)                           |                      | 140 (10.5%)                                 |                      | 20 (1.5%)                |                      |
| Less than high school               | 142   | 53 (37.3%)               | 0.84                 | 43 (30.3%)                            | 0.87                 | 16 (11.3%)                                  | 0.68                 | 3 (2.1%)                 | 0.55                 |
| High school and greater             | 2,092 | 763 (36.5%)              |                      | 620 (29.6%)                           |                      | 213 (10.2%)                                 |                      | 31 (1.5%)                |                      |
| Area-level poverty >25%             | 371   | 152 (41.0%)              | 0.054                | 120 (32.3%)                           | 0.21                 | 37 (10.0%)                                  | 0.95                 | 8 (2.2%)                 | 0.26                 |
| Area-level poverty ≤25%             | 1,827 | 652 (35.7%)              |                      | 532 (29.1%)                           |                      | 184 (10.1%)                                 |                      | 25 (1.4%)                |                      |
| Rural                               | 365   | 124 (34.0%)              | 0.25                 | 106 (29.0%)                           | 0.75                 | 35 (9.6%)                                   | 0.70                 | 8 (2.2%)                 | 0.27                 |
| Urban                               | 1,841 | 684 (37.2%)              |                      | 550 (29.9%)                           |                      | 189 (10.3%)                                 |                      | 26 (1.4%)                |                      |
| Poor public health infrastructure   | 709   | 263 (37.1%)              | 0.70                 | 217 (30.6%)                           | 0.51                 | 65 (9.2%)                                   | 0.25                 | 14 (2.0%)                | 0.23                 |
| Better public health infrastructure | 1,525 | 553 (36.3%)              |                      | 446 (29.2%)                           |                      | 164 (10.8%)                                 |                      | 20 (1.3%)                |                      |
| Medicaid non-expansion              | 1,240 | 441 (35.6%)              | 0.29                 | 364 (29.4%)                           | 0.71                 | 122 (9.8%)                                  | 0.47                 | 25 (2.0%)                | 0.03                 |
| Medicaid expansion                  | 994   | 375 (37.7%)              |                      | 299 (30.1%)                           |                      | 107 (10.8%)                                 |                      | 9 (0.9%)                 |                      |
| More segregated neighborhood        | 1,122 | 454 (40.5%)              | <0.001               | 368 (32.8%)                           | 0.001                | 118 (10.5%)                                 | 0.68                 | 19 (1.7%)                | 0.51                 |
| Less segregated neighborhood        | 1,112 | 362 (32.6%)              |                      | 295 (26.5%)                           |                      | 111 (10.0%)                                 |                      | 15 (1.3%)                |                      |

<sup>a</sup>Row percentage. Denominator is number of individuals with that characteristic.

<sup>b</sup>Chi-square test comparing percentage with versus without the characteristic

**Table 3.** Social determinants of health and impact of the COVID-19 pandemic on access to care among participants in the REasons for Geographic And Racial Differences in Stroke (REGARDS) study

|                                     | No change<br>N (% <sup>a</sup> ) | Mild. Appointments<br>moved to telehealth<br>N (% <sup>a</sup> ) | Moderate. Delays or cancellations<br>in appointments and/or delays in<br>getting prescriptions; changes<br>have minimal impact on health<br>N (% <sup>a</sup> ) | Severe. Unable to access<br>needed care resulting in<br>moderate to severe<br>impact on health<br>N (% <sup>a</sup> ) | p-value <sup>b</sup> |
|-------------------------------------|----------------------------------|------------------------------------------------------------------|-----------------------------------------------------------------------------------------------------------------------------------------------------------------|-----------------------------------------------------------------------------------------------------------------------|----------------------|
| Overall                             | 4,840 (51.0%)                    | 2,130 (22.4%)                                                    | 2,381 (25.1%)                                                                                                                                                   | 141 (1.5%)                                                                                                            |                      |
| Black                               | 1,817 (53.2%)                    | 748 (21.9%)                                                      | 802 (23.5%)                                                                                                                                                     | 49 (1.4%)                                                                                                             | 0.01                 |
| White                               | 3,023 (49.8%)                    | 1,382 (22.8%)                                                    | 1,579 (26.0%)                                                                                                                                                   | 92 (1.5%)                                                                                                             |                      |
| Income <\$35,000                    | 1,643 (57.1%)                    | 532 (18.5%)                                                      | 658 (22.9%)                                                                                                                                                     | 43 (1.5%)                                                                                                             | <0.001               |
| Income ≥\$35,000                    | 2,477 (46.3%)                    | 1,372 (25.6%)                                                    | 1,431 (26.7%)                                                                                                                                                   | 76 (1.4%)                                                                                                             |                      |
| Income not reported                 | 720 (57.1%)                      | 226 (17.9%)                                                      | 292 (23.2%)                                                                                                                                                     | 22 (1.8%)                                                                                                             |                      |
| Unmarried                           | 1,970 (52.9%)                    | 773 (20.8%)                                                      | 922 (24.8%)                                                                                                                                                     | 60 (1.6%)                                                                                                             | 0.005                |
| Married                             | 2,870 (49.8%)                    | 1,357 (23.5%)                                                    | 1,459 (25.3%)                                                                                                                                                   | 81 (1.4%)                                                                                                             |                      |
| Less than high school               | 390 (69.9%)                      | 61 (10.9%)                                                       | 98 (17.6%)                                                                                                                                                      | 9 (1.6%)                                                                                                              | <0.001               |
| High school and greater             | 4,449 (49.8%)                    | 2,069 (23.2%)                                                    | 2,283 (25.6%)                                                                                                                                                   | 132 (1.5%)                                                                                                            |                      |
| Area-level poverty >25%             | 816 (54.8%)                      | 322 (21.6%)                                                      | 332 (22.3%)                                                                                                                                                     | 18 (1.2%)                                                                                                             | 0.006                |
| Area-level poverty ≤25%             | 3,930 (50.1%)                    | 1,774 (22.6%)                                                    | 2,014 (25.7%)                                                                                                                                                   | 120 (1.5%)                                                                                                            |                      |
| Rural                               | 898 (56.7%)                      | 325 (20.5%)                                                      | 336 (21.2%)                                                                                                                                                     | 25 (1.6%)                                                                                                             | <0.001               |
| Urban                               | 3,889 (49.8%)                    | 1,782 (22.8%)                                                    | 2,020 (25.9%)                                                                                                                                                   | 116 (1.5%)                                                                                                            |                      |
| Poor public health infrastructure   | 1,696 (54.1%)                    | 683 (21.8%)                                                      | 711 (22.7%)                                                                                                                                                     | 46 (1.5%)                                                                                                             | <0.001               |
| Better public health infrastructure | 3,144 (49.5%)                    | 1,447 (22.8%)                                                    | 1,670 (26.3%)                                                                                                                                                   | 95 (1.5%)                                                                                                             |                      |
| Medicaid non-expansion              | 2,710 (52.8%)                    | 1,111 (21.7%)                                                    | 1,239 (24.2%)                                                                                                                                                   | 71 (1.4%)                                                                                                             | 0.002                |
| Medicaid expansion                  | 2,130 (48.8%)                    | 1,019 (23.4%)                                                    | 1,142 (26.2%)                                                                                                                                                   | 70 (1.6%)                                                                                                             |                      |
| More segregated neighborhood        | 2,385 (50.3%)                    | 1,039 (21.9%)                                                    | 1,249 (26.3%)                                                                                                                                                   | 71 (1.5%)                                                                                                             | 0.04                 |
| Less segregated neighborhood        | 2,451 (51.7%)                    | 1,090 (23.0%)                                                    | 1,130 (23.8%)                                                                                                                                                   | 70 (1.5%)                                                                                                             |                      |

<sup>a</sup>Row percentage. Denominator is number of individuals with that characteristic.

<sup>b</sup>Chi-square test comparing percentage with versus without the characteristic

**Table 3a.** Social determinants of health and impact of the COVID-19 pandemic on access to care among participants in the REasons for Geographic And Racial Differences in Stroke (REGARDS) study, standardized to the age, race, sex, and geographic distribution of the 2020 US Census

|                                     | No change      | Mild. Appointments moved to telehealth | Moderate. Delays or cancellations in appointments and/or delays in getting prescriptions; changes have minimal impact on health | Severe. Unable to access needed care resulting in moderate to severe impact on health | p-value <sup>b</sup> |
|-------------------------------------|----------------|----------------------------------------|---------------------------------------------------------------------------------------------------------------------------------|---------------------------------------------------------------------------------------|----------------------|
|                                     | % <sup>a</sup> | % <sup>a</sup>                         | % <sup>a</sup>                                                                                                                  | % <sup>a</sup>                                                                        |                      |
| Overall                             | 41.3%          | 27.2%                                  | 29.8%                                                                                                                           | 1.7%                                                                                  |                      |
| Black                               | 43.4%          | 27.2%                                  | 27.4%                                                                                                                           | 1.9%                                                                                  | 0.33                 |
| White                               | 41.0%          | 27.2%                                  | 30.1%                                                                                                                           | 1.7%                                                                                  |                      |
| Income <\$35,000                    | 49.3%          | 21.6%                                  | 27.4%                                                                                                                           | 1.7%                                                                                  | <0.001               |
| Income ≥\$35,000                    | 37.9%          | 29.9%                                  | 30.6%                                                                                                                           | 1.6%                                                                                  |                      |
| Income not reported                 | 47.5%          | 20.8%                                  | 29.2%                                                                                                                           | 2.4%                                                                                  |                      |
| Unmarried                           | 44.4%          | 25.1%                                  | 28.8%                                                                                                                           | 1.7%                                                                                  | 0.12                 |
| Married                             | 40.0%          | 28.1%                                  | 30.3%                                                                                                                           | 1.7%                                                                                  |                      |
| Less than high school               | 55.8%          | 8.4%                                   | 34.7%                                                                                                                           | 1.2%                                                                                  | <0.001               |
| High school and greater             | 40.9%          | 27.7%                                  | 29.7%                                                                                                                           | 1.7%                                                                                  |                      |
| Area-level poverty >25%             | 43.9%          | 26.1%                                  | 28.5%                                                                                                                           | 1.6%                                                                                  | 0.72                 |
| Area-level poverty ≤25%             | 40.8%          | 27.4%                                  | 30.1%                                                                                                                           | 1.7%                                                                                  |                      |
| Rural                               | 47.5%          | 25.5%                                  | 24.7%                                                                                                                           | 2.3%                                                                                  | 0.02                 |
| Urban                               | 40.2%          | 27.4%                                  | 30.8%                                                                                                                           | 1.6%                                                                                  |                      |
| Poor public health infrastructure   | 46.4%          | 24.0%                                  | 27.8%                                                                                                                           | 1.8%                                                                                  | 0.02                 |
| Better public health infrastructure | 40.1%          | 27.9%                                  | 30.3%                                                                                                                           | 1.7%                                                                                  |                      |
| Medicaid non-expansion              | 45.7%          | 24.7%                                  | 28.2%                                                                                                                           | 1.5%                                                                                  | 0.01                 |
| Medicaid expansion                  | 39.6%          | 28.2%                                  | 30.5%                                                                                                                           | 1.8%                                                                                  |                      |
| More segregated neighborhood        | 41.2%          | 25.3%                                  | 32.2%                                                                                                                           | 1.4%                                                                                  | 0.02                 |
| Less segregated neighborhood        | 41.5%          | 29.1%                                  | 27.4%                                                                                                                           | 2.0%                                                                                  |                      |

<sup>a</sup>Row percentage standardized to the age, race, sex, and geographic distribution of estimated US 2020 population

<sup>b</sup>P-value from multinomial logistic regression with inverse probability of sampling weights and robust standard errors

**Table 3b.** Social determinants of health and impact of the COVID-19 pandemic on access to care among participants in the REasons for Geographic And Racial Differences in Stroke (REGARDS) study, July 6, 2020-December 31, 2020

|                                     | No change<br>N (% <sup>a</sup> ) | Mild. Appointments<br>moved to telehealth<br>N (% <sup>a</sup> ) | Moderate. Delays or cancellations<br>in appointments and/or delays in<br>getting prescriptions; changes<br>have minimal impact on health<br>N (% <sup>a</sup> ) | Severe. Unable to access<br>needed care resulting in<br>moderate to severe<br>impact on health<br>N (% <sup>a</sup> ) | p-value <sup>b</sup> |
|-------------------------------------|----------------------------------|------------------------------------------------------------------|-----------------------------------------------------------------------------------------------------------------------------------------------------------------|-----------------------------------------------------------------------------------------------------------------------|----------------------|
| Overall                             | 3,478 (49.2%)                    | 1,640 (23.2%)                                                    | 1,834 (26.0%)                                                                                                                                                   | 115 (1.6%)                                                                                                            |                      |
| Black                               | 1,255 (50.8%)                    | 574 (23.2%)                                                      | 601 (24.3%)                                                                                                                                                     | 40 (1.6%)                                                                                                             | 0.12                 |
| White                               | 2,223 (48.4%)                    | 1,066 (23.2%)                                                    | 1,233 (26.8%)                                                                                                                                                   | 75 (1.6%)                                                                                                             |                      |
| Income <\$35,000                    | 1,170 (55.3%)                    | 400 (18.9%)                                                      | 508 (24.0%)                                                                                                                                                     | 37 (1.7%)                                                                                                             | <0.001               |
| Income ≥\$35,000                    | 1,792 (44.7%)                    | 1,066 (26.6%)                                                    | 1,096 (27.3%)                                                                                                                                                   | 59 (1.5%)                                                                                                             |                      |
| Income not reported                 | 516 (55.0%)                      | 174 (18.5%)                                                      | 230 (24.5%)                                                                                                                                                     | 19 (2.0%)                                                                                                             |                      |
| Unmarried                           | 1,388 (50.3%)                    | 592 (21.4%)                                                      | 727 (26.3%)                                                                                                                                                     | 53 (1.9%)                                                                                                             | 0.02                 |
| Married                             | 2,090 (48.5%)                    | 1,048 (24.3%)                                                    | 1,107 (25.7%)                                                                                                                                                   | 62 (1.4%)                                                                                                             |                      |
| Less than high school               | 286 (71.0%)                      | 42 (10.4%)                                                       | 67 (16.6%)                                                                                                                                                      | 8 (2.0%)                                                                                                              | <0.001               |
| High school and greater             | 3,191 (47.9%)                    | 1,598 (24.0%)                                                    | 1,767 (26.5%)                                                                                                                                                   | 107 (1.6%)                                                                                                            |                      |
| Area-level poverty >25%             | 576 (53.3%)                      | 245 (22.7%)                                                      | 246 (22.8%)                                                                                                                                                     | 13 (1.2%)                                                                                                             | 0.01                 |
| Area-level poverty ≤25%             | 2,835 (48.4%)                    | 1,367 (23.3%)                                                    | 1,558 (26.6%)                                                                                                                                                   | 99 (1.7%)                                                                                                             |                      |
| Rural                               | 645 (54.8%)                      | 247 (21.0%)                                                      | 264 (22.4%)                                                                                                                                                     | 20 (1.7%)                                                                                                             | <0.001               |
| Urban                               | 2,794 (48.0%)                    | 1,377 (23.7%)                                                    | 1,556 (26.7%)                                                                                                                                                   | 95 (1.6%)                                                                                                             |                      |
| Poor public health infrastructure   | 1,229 (52.0%)                    | 540 (22.9%)                                                      | 554 (23.5%)                                                                                                                                                     | 39 (1.7%)                                                                                                             | 0.002                |
| Better public health infrastructure | 2,249 (47.8%)                    | 1,100 (23.4%)                                                    | 1,280 (27.2%)                                                                                                                                                   | 76 (1.6%)                                                                                                             |                      |
| Medicaid non-expansion              | 1,927 (50.9%)                    | 850 (22.5%)                                                      | 952 (25.2%)                                                                                                                                                     | 56 (1.5%)                                                                                                             | 0.02                 |
| Medicaid expansion                  | 1,551 (47.3%)                    | 790 (24.1%)                                                      | 882 (26.9%)                                                                                                                                                     | 59 (1.8%)                                                                                                             |                      |
| More segregated neighborhood        | 1,720 (48.5%)                    | 803 (22.7%)                                                      | 962 (27.2%)                                                                                                                                                     | 58 (1.6%)                                                                                                             | 0.14                 |
| Less segregated neighborhood        | 1,754 (49.9%)                    | 836 (23.8%)                                                      | 870 (24.7%)                                                                                                                                                     | 57 (1.6%)                                                                                                             |                      |

<sup>a</sup>Row percentage. Denominator is number of individuals with that characteristic.

<sup>b</sup>Chi-square test comparing percentage with versus without the characteristic

**Table 3c.** Social determinants of health and impact of the COVID-19 pandemic on access to care among participants in the REasons for Geographic And Racial Differences in Stroke (REGARDS) study, January 1, 2021-September 6, 2021

|                                     | No change<br>N (% <sup>a</sup> ) | Mild. Appointments<br>moved to telehealth<br>N (% <sup>a</sup> ) | Moderate. Delays or cancellations<br>in appointments and/or delays in<br>getting prescriptions; changes<br>have minimal impact on health<br>N (% <sup>a</sup> ) | Severe. Unable to access<br>needed care resulting in<br>moderate to severe<br>impact on health<br>N (% <sup>a</sup> ) | p-value <sup>b</sup> |
|-------------------------------------|----------------------------------|------------------------------------------------------------------|-----------------------------------------------------------------------------------------------------------------------------------------------------------------|-----------------------------------------------------------------------------------------------------------------------|----------------------|
| Overall                             | 1,362 (56.2%)                    | 490 (20.2%)                                                      | 547 (22.6%)                                                                                                                                                     | 26 (1.1%)                                                                                                             |                      |
| Black                               | 562 (59.4%)                      | 174 (18.4%)                                                      | 201 (21.2%)                                                                                                                                                     | 9 (1.0%)                                                                                                              | 0.08                 |
| White                               | 800 (54.1%)                      | 316 (21.4%)                                                      | 346 (23.4%)                                                                                                                                                     | 17 (1.1%)                                                                                                             |                      |
| Income <\$35,000                    | 473 (62.2%)                      | 132 (17.3%)                                                      | 150 (19.7%)                                                                                                                                                     | 6 (0.8%)                                                                                                              | <0.001               |
| Income ≥\$35,000                    | 685 (51.0%)                      | 306 (22.8%)                                                      | 335 (24.9%)                                                                                                                                                     | 17 (1.3%)                                                                                                             |                      |
| Income not reported                 | 204 (63.6%)                      | 52 (16.2%)                                                       | 62 (19.3%)                                                                                                                                                      | 3 (0.9%)                                                                                                              |                      |
| Unmarried                           | 582 (60.3%)                      | 181 (18.8%)                                                      | 195 (20.2%)                                                                                                                                                     | 7 (0.7%)                                                                                                              | 0.006                |
| Married                             | 780 (53.4%)                      | 309 (21.2%)                                                      | 352 (24.1%)                                                                                                                                                     | 19 (1.3%)                                                                                                             |                      |
| Less than high school               | 104 (67.1%)                      | 19 (12.3%)                                                       | 31 (20.0%)                                                                                                                                                      | 1 (0.6%)                                                                                                              | 0.02                 |
| High school and greater             | 1,258 (55.4%)                    | 471 (20.7%)                                                      | 516 (22.7%)                                                                                                                                                     | 25 (1.1%)                                                                                                             |                      |
| Area-level poverty >25%             | 240 (58.8%)                      | 77 (18.9%)                                                       | 86 (21.1%)                                                                                                                                                      | 5 (1.2%)                                                                                                              | 0.60                 |
| Area-level poverty ≤25%             | 1,095 (55.3%)                    | 407 (20.6%)                                                      | 456 (23.0%)                                                                                                                                                     | 21 (1.1%)                                                                                                             |                      |
| Rural                               | 253 (62.0%)                      | 78 (19.1%)                                                       | 72 (17.6%)                                                                                                                                                      | 5 (1.2%)                                                                                                              | 0.04                 |
| Urban                               | 1,095 (55.2%)                    | 405 (20.4%)                                                      | 464 (23.4%)                                                                                                                                                     | 21 (1.1%)                                                                                                             |                      |
| Poor public health infrastructure   | 467 (60.3%)                      | 143 (18.5%)                                                      | 157 (20.3%)                                                                                                                                                     | 7 (0.9%)                                                                                                              | 0.04                 |
| Better public health infrastructure | 895 (54.2%)                      | 347 (21.0%)                                                      | 390 (23.6%)                                                                                                                                                     | 19 (1.2%)                                                                                                             |                      |
| Medicaid non-expansion              | 783 (58.2%)                      | 261 (19.4%)                                                      | 287 (21.3%)                                                                                                                                                     | 15 (1.1%)                                                                                                             | 0.15                 |
| Medicaid expansion                  | 579 (53.7%)                      | 229 (21.2%)                                                      | 260 (24.1%)                                                                                                                                                     | 11 (1.0%)                                                                                                             |                      |
| More segregated neighborhood        | 665 (55.4%)                      | 236 (19.7%)                                                      | 287 (23.9%)                                                                                                                                                     | 13 (1.1%)                                                                                                             | 0.47                 |
| Less segregated neighborhood        | 697 (56.9%)                      | 254 (20.8%)                                                      | 260 (21.2%)                                                                                                                                                     | 13 (1.1%)                                                                                                             |                      |

<sup>a</sup>Row percentage. Denominator is number of individuals with that characteristic.

<sup>b</sup>Chi-square test comparing percentage with versus without the characteristic
